# Supplementary material
Source: HighWire-hosted journal article supplement (https://jnm.snmjournals.org/highwire/filestream/95195/field_highwire_adjunct_files/0/191882_Supplemental_Data.pdf)
Supplement: 191882_Supplemental_Data.pdf [file 191882_Supplemental_Data.pdf]

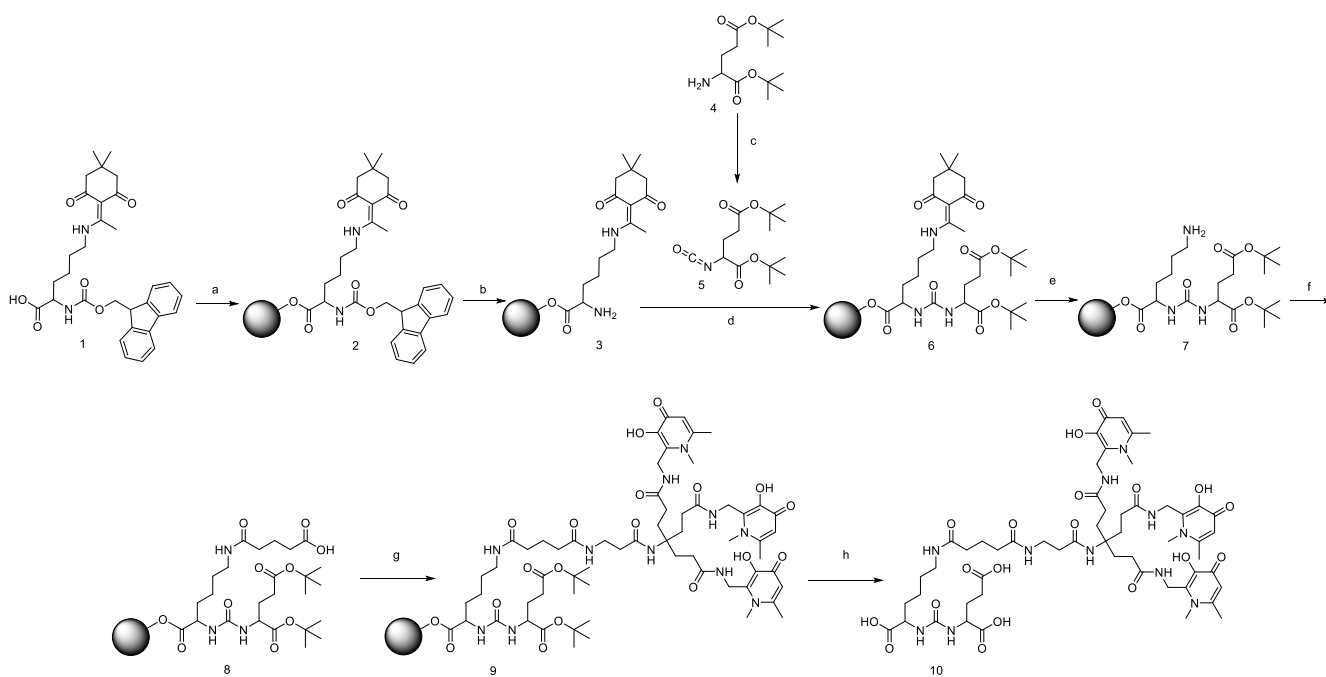

**SUPPLEMENTAL FIGURE 1:** Reaction scheme for synthesis of THP-PSMA. a. 2-chlorotriethyl polymer bound resin beads, DIPEA, DCM; b. Piperidine, DMF; c. Triphosgene, DIPEA, DCM, 0 °C; d. Compound **3**, Compound **5**, DCM; e. Hydrazine hydrate, DMF; f. Glutaric anhydride, DIPEA, DMF; g. THP-NH<sub>2</sub>, HATU, DIPEA, DMF, DMSO; h. TFA, phenol, TIPS, H<sub>2</sub>O

|                                                                                                  |                                                                                                                                                                                                                                                                                                                                                                                                                                                            |
|--------------------------------------------------------------------------------------------------|------------------------------------------------------------------------------------------------------------------------------------------------------------------------------------------------------------------------------------------------------------------------------------------------------------------------------------------------------------------------------------------------------------------------------------------------------------|
| <sup>1</sup> H NMR: (D <sub>2</sub> O, 700 MHz)                                                  | 1.37 (m, 2H), 1.50 (m, 2H), 1.7 (m, 1H), 1.78 (m, 2H), 1.85 (m, 1H), 1.92 (t, <i>J</i> = 8.09, 6H), 1.96 (m, 1H), 2.14 (m, 1H), 2.18 (q, <i>J</i> = 6.59, 4H), 2.22 (t, <i>J</i> = 8.09, 6H), 2.35 (t, <i>J</i> = 6.64, 2H), 2.49 (t, <i>J</i> = 7.49, 2H), 2.57 (s, 9H), 3.13 (t, <i>J</i> = 6.98, 2H), 3.36 (t, <i>J</i> = 6.64, 2H), 3.91 (s, 9H), 4.15 (dd, <i>J</i> = 8.99, 5.59 1H), 4.23 (dd, <i>J</i> = 8.70, 4.97 1H), 4.67 (s, 9H), 7.00 (s, 3H) |
| <sup>13</sup> C NMR: (D <sub>2</sub> O, pH 3, 175 MHz)                                           | 20.5, 21.9, 22.4, 26.5, 27.8, 29.3, 29.4, 30.1, 30.7, 34.8, 35.5, 35.9, 36.1, 38.5, 39.0, 52.8, 113.6, 138.1, 143.2, 149.9, 159.4, 161.0, 173.2, 175.5, 175.7, 176.2, 176.6, 177.4                                                                                                                                                                                                                                                                         |
| ESI-MS: m/z [C <sub>54</sub> H <sub>77</sub> N <sub>11</sub> O <sub>19</sub> + H] <sup>+</sup>   | observed monoisotopic peak = 1184.5494<br>calculated = 1184.5475                                                                                                                                                                                                                                                                                                                                                                                           |
| ESI-MS: m/z [C <sub>54</sub> H <sub>77</sub> N <sub>11</sub> O <sub>19</sub> + 2H] <sup>+2</sup> | observed monoisotopic peak = 592.7768,<br>calculated = 592.7788                                                                                                                                                                                                                                                                                                                                                                                            |
| ESI-MS: m/z [C <sub>54</sub> H <sub>77</sub> N <sub>11</sub> O <sub>19</sub> + 3H] <sup>+3</sup> | observed monoisotopic peak = 395.5202,<br>calculated = 395.5221                                                                                                                                                                                                                                                                                                                                                                                            |
| m/z [C <sub>54</sub> H <sub>74</sub> N <sub>11</sub> O <sub>19</sub> Ga + H] <sup>+</sup>        | observed monoisotopic peak = 1250.45092<br>calculated = 1250.449102                                                                                                                                                                                                                                                                                                                                                                                        |
| m/z [C <sub>54</sub> H <sub>74</sub> N <sub>11</sub> O <sub>19</sub> Ga + 2H] <sup>+2</sup>      | observed monoisotopic peak = 625.72846,<br>calculated = 625.72819                                                                                                                                                                                                                                                                                                                                                                                          |

**SUPPLEMENTAL TABLE 1:** <sup>1</sup>H NMR, <sup>13</sup>C NMR and ESI-MS data for THP-PSMA confirming its identity.

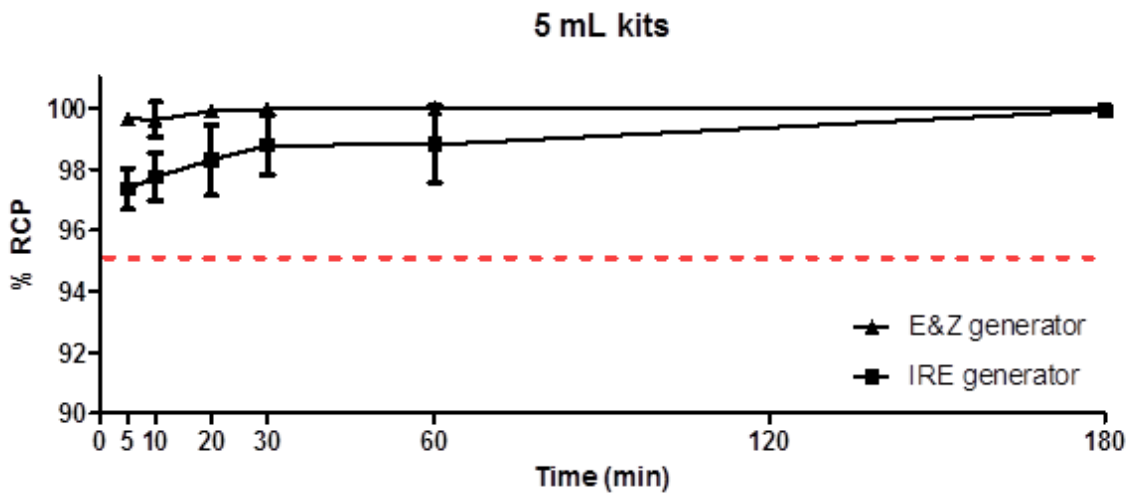

**SUPPLEMENTAL FIGURE 2:** Radiochemical purity as measured by iTLC of  $^{68}\text{Ga}$ -THP-PSMA labeled with 5mL one step kits as a function of incubation time at room temperature, with both an IRE generator and an E&Z generator. Broken red line represents quality control threshold of 95% (n=3, mean  $\pm$  SD)

**Serum Stability:**

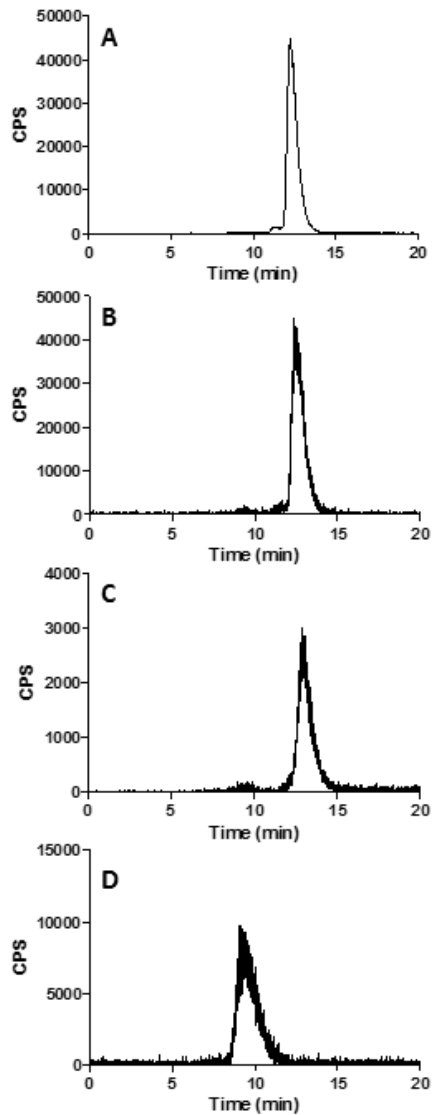

**SUPPLEMENTAL FIGURE 3.** Size exclusion HPLC chromatograms of (A)  $^{68}\text{Ga}$ -THP-PSMA; (B)  $^{68}\text{Ga}$ -THP-PSMA after 6 hours incubation in human serum at 37°C; <2% transchelation to serum (C)  $^{67}\text{Ga}$ -THP-PSMA after 8 days incubation in human

serum at 37°C <5% transchelation to serum (D)  $^{68}\text{Ga}^{3+}$  incubated in human serum for 6 hours. All chromatograms have been decay corrected.

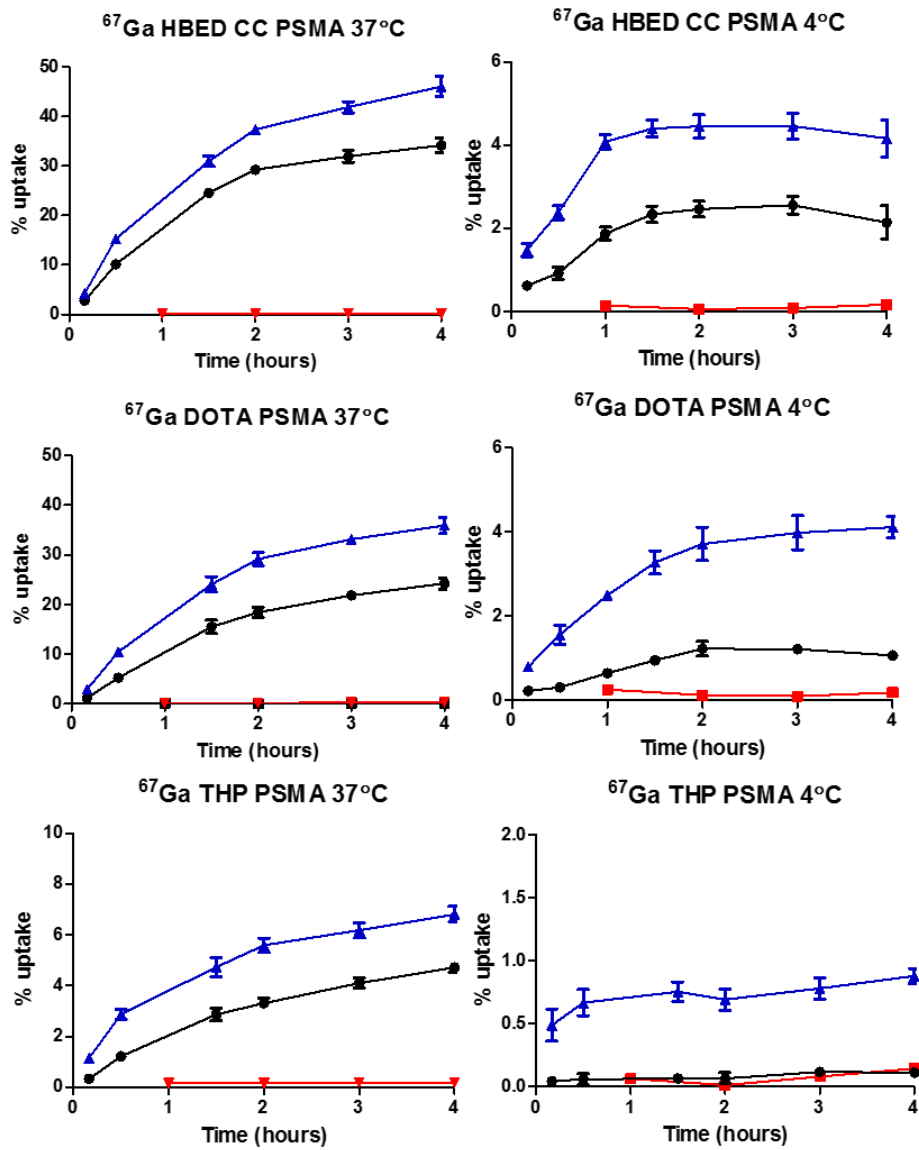

**SUPPLEMENTAL FIGURE 4:** Uptake of 1nM  $^{67}\text{Ga}$ -HBED-CC-PSMA  $^{67}\text{Ga}$ -DOTA-PSMA and  $^{67}\text{Ga}$ -THP-PSMA over time at 4°C and 37°C,  $1 \times 10^6$  cells/mL. Combined internalized and cell surface bound activity DU145-PSMA cells (blue); internalized activity DU145-PSMA cells (black); internalized and cell surface bound activity DU145 cells (red). (n=4, mean  $\pm$  SD) per time point per tracer. DU145 and DU145-PSMA cells were provided by Dr Florian Kampmeier (1).

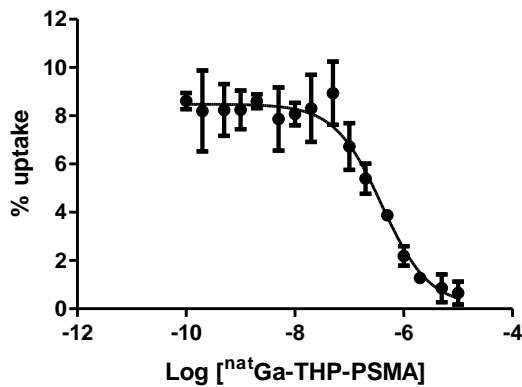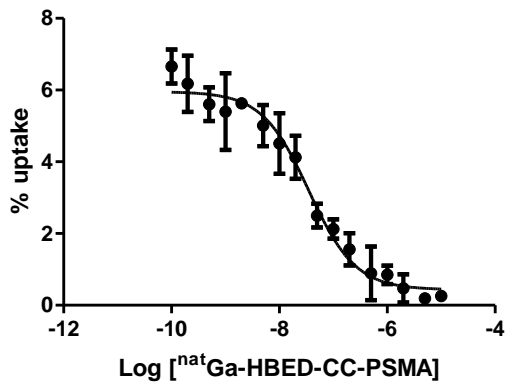

**SUPPLEMENTAL FIGURE 5:** Representative IC<sub>50</sub> experiments for <sup>nat</sup>Ga-THP-PSMA and <sup>nat</sup>Ga-HBED-CC-PSMA with 1nM <sup>68</sup>Ga-DOTA-PSMA as the probe. (n=4) for each concentration. IC<sub>50</sub> values in main text are the mean of at least 3 experiments.

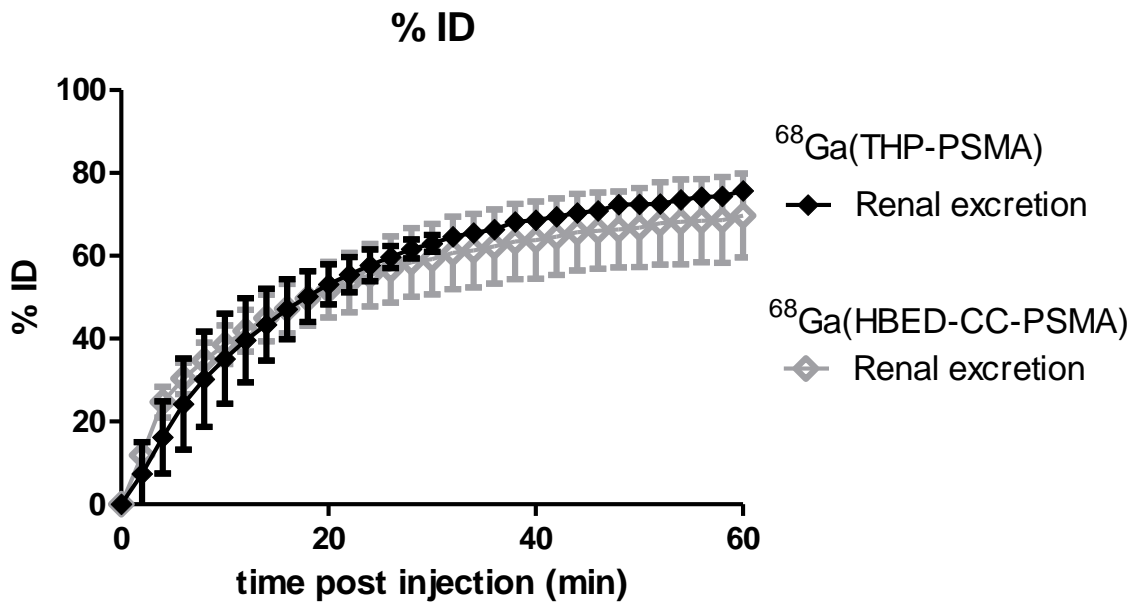

**SUPPLEMENTAL FIGURE 6.** Time activity curves of SCID beige mice bearing DU145-PSMA tumors, derived from PET imaging data from mice imaged with <sup>68</sup>Ga-THP-PSMA or <sup>68</sup>Ga-HBED-CC-PSMA during one hour post injection. Plotted data is the mean and standard deviation of three mice calculated from the total % ID in the kidneys and bladder combined.





| Tumor type                   | <sup>68</sup> Ga-THP-PSMA |            |                            | <sup>68</sup> Ga-HBED-CC-PSMA |
|------------------------------|---------------------------|------------|----------------------------|-------------------------------|
|                              | Group 1                   | Group 4    | Group 3                    | Group 2                       |
|                              | DU145-PSMA                | DU145      | DU145-PSMA<br>Blocked PMPA | DU145-PSMA                    |
|                              | (n=3)                     | (n=3)      | (n=3)                      | (n=3)                         |
| Tumor                        | 16.4 ± 7.4                | 0.69 ± 0.7 | 1.40 ± 0.2                 | 19.5 ± 7.6                    |
| Blood                        | 0.73 ± 0.4                | 1.23 ± 1.7 | 1.11 ± 0.7                 | 2.18 ± 1.2                    |
| Intestines                   | 0.35 ± 0.1                | 0.64 ± 0.6 | 0.71 ± 0.3                 | 1.20 ± 0.5                    |
| Kidney                       | 40.4 ± 34                 | 52.3 ± 77  | 5.20 ± 5.0                 | 63.4 ± 23                     |
| Liver                        | 0.45 ± 0.2                | 0.59 ± 0.7 | 0.60 ± 0.2                 | 0.69 ± 0.1                    |
| Lungs                        | 0.50 ± 0.2                | 0.94 ± 1.3 | 0.72 ± 0.3                 | 1.29 ± 0.4                    |
| Muscle                       | 0.51 ± 0.4                | 0.31 ± 0.4 | 0.21 ± 0.1                 | 0.26 ± 0.1                    |
| Salivary glands              | 0.28 ± 0.1                | 0.48 ± 0.7 | 0.33 ± 0.2                 | 0.76 ± 0.1                    |
| Spleen                       | 3.70 ± 1.3                | 3.61 ± 3.1 | 0.75 ± 0.1                 | 17.6 ± 6.1                    |
| <b>Tumor to organ ratios</b> |                           |            |                            |                               |
| Tumor to blood               | 30.8 ± 28                 | 0.93 ± 0.4 | 1.64 ± 0.9                 | 11.0 ± 6.0                    |
| Tumor to muscle              | 44.6 ± 28                 | 3.16 ± 1.1 | 9.79 ± 6.8                 | 77.0 ± 34                     |
| Tumor to spleen              | 4.38 ± 0.8                | 0.17 ± 0.1 | 1.87 ± 0.3                 | 1.16 ± 0.42                   |

**SUPPLEMENTAL TABLE 2.** Ex vivo biodistribution at 1 hour post injection for PET-imaged mice. Mice bearing DU145-PSMA tumors were injected with <sup>68</sup>Ga-THP-PSMA, <sup>68</sup>Ga-THP-PSMA plus blocking agent PMPA, or <sup>68</sup>Ga-HBED-CC-PSMA. Mice bearing control DU145 tumors were imaged with <sup>68</sup>Ga-THP-PSMA only.

## REFERENCES

1. Kampmeier F, Williams JD, Maher J, Mullen GE, Blower PJ. Design and preclinical evaluation of a  $^{99m}\text{Tc}$ -labelled diabody of mAb J591 for SPECT imaging of prostate-specific membrane antigen (PSMA). *EJNMMI Res.* 2014;4:13.
